# Supplementary material
Source: PubMed Central journal article supplement (PMC4361246)
Supplement: NIHMS662301-supplement-Supp_FigureS1.pdf [file NIHMS662301-supplement-Supp_FigureS1.pdf]

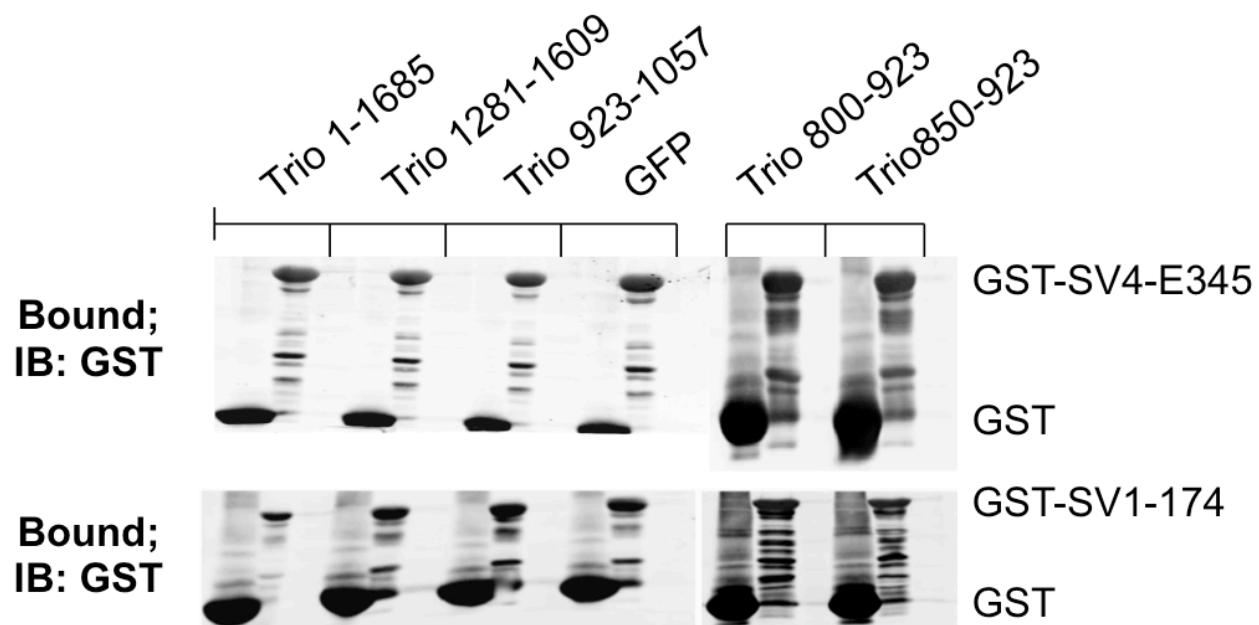

**Supplementary Figure S1.** Immunoblots stained with anti-GST to show the relative amounts of column-bound GST proteins corresponding to the experiments shown in Figure 4D.

**Supplemental Figure S1**
